# Supplementary material for: Construction and Validation of an Autophagy-Related Prognostic Model for Osteosarcoma Patients
Source: Hindawi journal article supplement (doi:10.1155/2021/9943465), 2021-05-29

# Decision tree

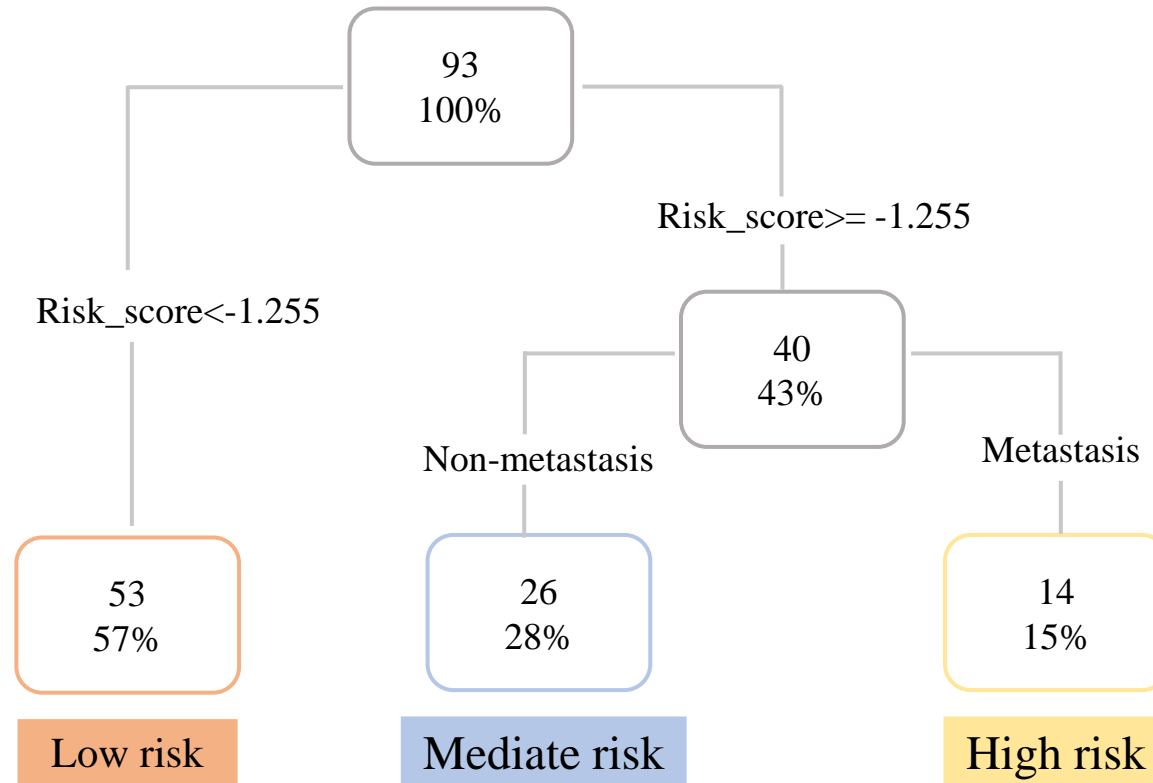

Supplement: f1 [file 9943465.f1.pdf]
